# Supplementary material for: KARL: Knowledge Augmented Rule Learning for Informed Biomarker Discovery
Source: Preprints.org preprint supplement (doi:10.20944/preprints201908.0100.v1), 2019-08-08
Supplement: Supplementary file 2 [file supplementary]

Additional File 4: A snippet of Robust rule patterns discovered for breast and colon cancers. Each row contain rule pattern information, including the learned models of the rule, the rule identifier, the source of rule origin, and the rule patterns. Pr denotes the patterns origin from prior rules, and Nr denotes new rules.

| Breast                | Rule No. | Source | Patterns           |      |                   |
|-----------------------|----------|--------|--------------------|------|-------------------|
| GEO15852              | 01.      | Pr     | IF (KRT18 = High)  | THEN | (Class = Case)    |
|                       | 02.      | Pr     | IF (KRT18 = Low)   | THEN | (Class = Control) |
| Colon                 | Rule No. | Source | Patterns           |      |                   |
| GEO20916,<br>GEO24514 | 01.      | Pr     | IF (MMP7 = High)   | THEN | (Class = Case)    |
|                       | 02.      | Pr     | IF (MMP7 = Low)    | THEN | (Class = Control) |
|                       | 03.      | Nr     | IF (CDH3 = High)   | THEN | (Class = Case)    |
|                       | 04.      | Nr     | IF (CDH3 = Low)    | THEN | (Class = Control) |
| GEO23878              | 05.      | Nr     | IF ((ABCA8 = Low)  | THEN | (Class = Case)    |
|                       | 06.      | Nr     | IF (ABCA8 = High)  | THEN | (Class = Control) |
|                       | 07.      | Pr     | IF (CXCL12 = Low)  | THEN | (Class = Case)    |
|                       | 08.      | Pr     | IF (CXCL12 = High) | THEN | (Class = Control) |
|                       | 09.      | Pr     | IF (LPAR1 = Low)   | THEN | (Class = Case)    |
|                       | 10.      | Pr     | IF (LPAR1 = Low)   | THEN | (Class = Control) |
| GEO24514              | 11.      | Pr     | IF (MCM2 = Low)    | THEN | (Class = Control) |
|                       | 12.      | Pr     | IF (MCM2 = High)   | THEN | (Class = Case)    |
|                       | 13.      | Pr     | IF (PMAIP1 = Low)  | THEN | (Class = Control) |
|                       | 14.      | Pr     | IF (PMAIP1 = High) | THEN | (Class = Case)    |
|                       | 15.      | Nr     | IF (TEX10 = High)  | THEN | (Class = Case)    |
|                       | 16.      | Nr     | IF (TEX10 = Low)   | THEN | (Class = Control) |
| GEO9348               | 17.      | Pr     | IF (INHBA = High)  | THEN | (Class = Case)    |
|                       | 18.      | Pr     | IF (INHBA = Low)   | THEN | (Class = Control) |
| GEO10715              | 19.      | Pr     | IF (LILRB4 = High) | THEN | (Class = Control) |
|                       | 20.      | Pr     | IF (LILRB4 = Low)  | THEN | (Class = Control) |
