# Supplementary material for: KARL: Knowledge Augmented Rule Learning for Informed Biomarker Discovery
Source: Preprints.org preprint supplement (doi:10.20944/preprints201908.0100.v1), 2019-08-08
Supplement: Supplementary file 4 [file supplementary]

Additional File 2: Average Completeness on 10-Fold cross-validation for KARL vs. RL. The table results are reported in the KARL-result/RL-result format. ID = the dataset pointers used in Figure 2, ConMin = minimum Coverage for Controls, ConMax = maximum Coverage for Controls, ConMdn = median coverage for Controls, CaseMin = minimum Coverage for Cases, CaseMax = maximum Coverage for Cases, CaseMdn = median Coverage for Cases, AbsRate = %test samples not assigned a class.

| Dataset ID | ConMin  | ConMax  | ConMdn  | CaseMin | CaseMax | CaseMdn | AbsRate |
|------------|---------|---------|---------|---------|---------|---------|---------|
| A          | .40/.51 | .69/.69 | .55/.60 | .55/.55 | .79/.79 | .64/.64 | .00/1.1 |
| B          | .54/.60 | .78/.74 | .68/.67 | .51/.61 | .76/.73 | .66/.65 | .00/.00 |
| C          | .33/.43 | .65/.58 | .50/.50 | .43/.49 | .82/.82 | .62/.63 | .00/.00 |
| D          | .33/.43 | .70/.54 | .53/.46 | .45/.52 | .74/.74 | .58/.59 | .00/1.0 |
| E          | .34/.44 | .82/.82 | .53/.54 | .37/.50 | .82/.74 | .58/.59 | .00/1.2 |
| Average    | .39/.48 | .73/.67 | .56/.55 | .46/.53 | .79/.76 | .62/.62 | 0.0/.66 |
| F          | .50/.50 | .84/.84 | .65/.65 | .39/.40 | .60/.60 | .47/.49 | 1.1/1.1 |
| G          | .42/.42 | .86/.85 | .74/.64 | .36/.36 | .80/.72 | .53/.49 | .00/.00 |
| H          | 1.0/1.0 | 1.0/1.0 | 1.0/1.0 | 1.0/1.0 | 1.0/1.0 | 1.0/1.0 | .00/6.1 |
| I          | .89/.89 | .90/.90 | .89/.89 | .95/.97 | .98/.98 | .97/.98 | .00/1.6 |
| J          | .43/.45 | .60/.59 | .52/.54 | .49/.56 | .75/.75 | .62/.64 | .00/1.6 |
| Average    | .65/.65 | .84/.84 | .76/.74 | .64/.66 | .82/.81 | .72/.72 | .22/2.1 |
| K          | .67/.87 | .91/.91 | .81/.89 | .85/.89 | .96/.95 | .90/.92 | 3.3/13. |
| L          | 1.0/1.0 | 1.0/1.0 | 1.0/1.0 | 1.0/1.0 | 1.0/1.0 | 1.0/1.0 | .00/1.4 |
| M          | 1.0/1.0 | 1.0/1.0 | 1.0/1.0 | 1.0/1.0 | 1.0/1.0 | 1.0/1.0 | .00/5.1 |
| N          | .92/.93 | .95/.94 | .94/.94 | .73/.94 | 1.0/.96 | .93/.95 | .00/.00 |
| O          | 1.0/1.0 | 1.0/1.0 | 1.0/1.0 | 1.0/1.0 | 1.0/1.0 | 1.0/1.0 | 1.2/2.4 |
| Average    | .92/.96 | .97/.97 | .95/.97 | .92/.97 | .99/.98 | .97/.97 | .90/4.4 |
| P          | 1.0/1.0 | 1.0/1.0 | 1.0/1.0 | 1.0/1.0 | 1.0/1.0 | 1.0/1.0 | .00/1.9 |
| Q          | 1.0/1.0 | 1.0/1.0 | 1.0/1.0 | 1.0/1.0 | 1.0/1.0 | 1.0/1.0 | .00/4.4 |
| R          | .53/.58 | .96/.87 | .66/.69 | .72/.74 | .96/.96 | .90/.91 | .00/.00 |
| S          | .48/.58 | .96/.90 | .73/.79 | .60/.65 | .94/.83 | .72/.75 | .00/.83 |
| T          | .80/.82 | .98/.88 | .88/.87 | .83/.93 | .97/.97 | .93/.95 | .00/4.5 |
| Average    | .76/.80 | .98/.93 | .85/.87 | .83/.86 | .97/.95 | .91/.92 | .00/2.3 |
| U          | .32/.35 | .89/.58 | .48/.47 | .47/.54 | .88/.81 | .66/.62 | .00/3.6 |
| V          | .38/.42 | .82/.82 | .61/.69 | .35/.44 | .79/.63 | .53/.52 | .00/5.0 |
| W          | 1.0/1.0 | 1.0/1.0 | 1.0/1.0 | 1.0/1.0 | 1.0/1.0 | 1.0/1.0 | .00/4.0 |
| X          | .41/.56 | .82/.70 | .61/.64 | .56/.64 | .82/.82 | .69/.69 | .00/1.1 |
| Y          | .35/.35 | .85/.73 | .58/.56 | .36/.40 | .87/.64 | .57/.56 | .74/2.2 |
| Average    | .49/.54 | .88/.78 | .66/.67 | .55/.60 | .87/.78 | .69/.68 | .15/3.2 |
